# Supplementary material for: Stratified Predictors of Gait Speed Decline in Aging Adults: An Interpretable Machine Learning Approach using data from the CLSA
Source: Research Square preprint supplement (doi:10.21203/rs.3.rs-8108869/v1), 2025-12-16
Supplement: Supplementary file 1 [file 5affd0722a683caaa029f901.docx]

**Supplemental Table 1: List of 256 variables included in the mobility predictor analysis**

| **Predictors** |
| --- |
| Age in years |
| Beer consumed on weekdays (number of drinks) |
| Beer consumed on weekends (number of drinks) |
| Binge drinking female |
| Frequency alcohol consumption past 12 months |
| Alcohol consumption compared to heaviest drinking period |
| Liquors consumed on weekdays (number of drinks) |
| Liquors consumed on weekends (number of drinks) |
| Binge drinking male |
| Another kind of alcohol consumed on weekdays (number of drinks) |
| Another kind of alcohol consumed on weekends (number of drinks) |
| Red wine consumed on weekdays (number of drinks) |
| Red wine consumed on weekends (number of drinks) |
| White wine consumed on weekdays (number of drinks) |
| White wine consumed on weekends (number of drinks) |
| Albumin |
| Estimated Glomerular Filtration Rate |
| Ferritin |
| Granulocytes (absolute number) |
| Hemoglobin A1c |
| High-Density Lipoprotein |
| Hemoglobin |
| High Sensitivity C-Reactive Protein |
| Low-Density Lipoprotein, calculated |
| Lymphocytes (absolute number) |
| Mean corpuscular hemoglobin |
| Mean corpuscular volume |
| Monocytes (absolute number) |
| Platelets |
| Red blood cells |
| Red blood cell distribution width |
| Triglycerides |
| Thyroid-Stimulating Hormone |
| 25-hydroxyvitamin D |
| White blood cells |
| Average Diastolic Blood Pressure (All measurements) |
| Average Pulse (All measurements) |
| Average Systolic Blood Pressure (All measurements) |
| Relationship of the Main Care Recipient |
| Comorbidity: Cancer domain |
| Comorbidity: Cardiovascular domain |
| Comorbidity: Endocrine domain |
| Comorbidity: Genitourinary domain |
| Comorbidity: Gastrointestinal domain |
| Comorbidity: Musculoskeletal domain |
| Comorbidity: Neurological domain |
| Comorbidity: Opthalmalogic domain |
| Comorbidity: Renal domain |
| Comorbidity: Respiratory domain |
| Comorbidity: Total count |
| Animal fluency test: score 1 |
| Animal fluency test: score 2 |
| Mental alternation test score |
| Rey I: Auditory Verbal Learning Test |
| Rey II: Auditory Verbal Learning Test |
| Relationship of Main Caregiver |
| Flag for Receiving Formal or Informal Home Care (Last 12 Months) |
| Mean Reaction Time (in ms) |
| Died since bl visit |
| Center for Epidemiological Studies Short Depression Scale (CES-D 10) score |
| CES-D 10: count of missing items |
| Body Composition Index |
| Pure lean mass (without bone) in limbs |
| Pure lean mass (without bone) in head |
| Pure lean mass (without bone) in left leg |
| Pure lean mass (without bone) in left arm |
| Pure lean mass (without bone) in right leg |
| Pure lean mass (without bone) in right arm |
| Total pure lean mass (without bone) excluding head region |
| Pure lean mass (without bone) in trunk |
| Length of Left Hip Axis in cm |
| Femur Shaft Average Cortical Thickness (cm) - left hip |
| Femur Shaft Buckling Ratio (dimensionless) - left hip |
| Femur Shaft Center of Mass Position (dimensionless) - left hip |
| Femur Shaft Cross Sectional Area (cm2) - left hip |
| Femur Shaft Cross Sectional Moment of Inertia (cm4) - left hip |
| Femur Shaft Endocortical Diameter (cm) - left hip |
| Femur Shaft Profile Center Distance (cm) - left hip |
| Femur Shaft Section Modulus (cm3) - left hip |
| Femur Shaft Subperiosteal Width (cm) - left hip |
| Intertrochanter Average Cortical Thickness (cm) - left hip |
| Intertrochanter Buckling Ratio (dimensionless) - left hip |
| Intertrochanter Center of Mass Position (dimensionless) - left hip |
| Intertrochanter Cross Sectional Area (cm2) - left hip |
| Intertrochanter Cross Sectional Moment of Inertia (cm4) - left hip |
| Intertrochanter Endocortical Diameter (cm) - left hip |
| Intertrochanter Profile Center Distance (cm) - left hip |
| Intertrochanter Section Modulus (cm3) - left hip |
| Intertrochanter Subperiosteal Width (cm) - left hip |
| T-score for Neck Bone analysis - left hip |
| Narrow Neck Average Cortical Thickness (cm) - left hip |
| Narrow Neck Bone Mineral Density (g/cm2) -Left hip |
| Narrow Neck Buckling Ratio (dimensionless) - left hip |
| Narrow Neck Center of Mass Position (dimensionless) - left hip |
| Narrow Neck Cross Sectional Area (cm2) - left hip |
| Narrow Neck Cross Sectional Moment of Inertia (cm4) - left hip |
| Narrow Neck Endocortical Diameter (cm) - left hip |
| Narrow Neck Profile Center Distance (cm) - left hip |
| Narrow Neck Section Modulus (cm3) - left hip |
| Narrow Neck Subperiosteal Width (cm) - left hip |
| DXA total fat mass |
| Total BMD |
| P Duration |
| P Offset |
| P Onset |
| PP Interval |
| PQ Interval |
| Q Offset |
| Q Onset |
| QRS Duration |
| QRS Number |
| QT Interval |
| QTC Interval |
| RR Interval |
| T Offset |
| Ventricular Rate |
| Highest Level of Education - Respondent, 4 Levels |
| Highest Level of Education - Respondent, 11 Levels |
| Fall Status - 12 months |
| FAS test: __ score |
| 10 year probability (x 100) of hip fracture, without knowing BMD |
| 10 year probability (x 100) of osteoporotic fracture, without knowing BMD |
| Baseline gate speed (m/s) |
| Play games cards etc |
| Perceived Health |
| Perceived Mental Health |
| Self-rated general health |
| Self-rated mental health |
| Play musical instrument or sing |
| Self-rated healthy aging |
| Average grip strength for all trials |
| Average height in m |
| Hearing rating |
| Body Mass Index |
| Highest source of household income |
| Highest source of personal income |
| Second highest source of personal income |
| Total personal income |
| Second highest source of household income |
| Total household income |
| Number of times injured (past 12 months) |
| Frequency been to places outside town |
| Frequency been to places in the neighbourhood |
| Frequency been to outside area of home |
| Frequency been to places outside neighbourhood but within town |
| Frequency of consumption (times per day) of whole wheat breads, bran breads, multigrain breads, ryebreads |
| Frequency of consumption (times per day) of butter or regular margarine |
| Frequency of consumption (times per day) of other calcium-fortified beverages |
| Frequency of consumption (times per day) of Calcium-fortified juices |
| Frequency of consumption (times per day) of calcium-fortified foods |
| Frequency of consumption (times per day) of calcium-fortified milk (35% more calcium) |
| Frequency of consumption (times per day) of chicken, turkey |
| Frequency of consumption (times per day) of chocolate bars |
| Frequency of consumption (times per day) of all regular cheeses |
| Frequency of consumption (times per day) of carrots |
| Frequency of consumption (times per day) of milk-based desserts |
| Frequency of consumption (times per day) of regular vinaigrettes, dressings, and dips |
| Frequency of consumption (times per day) of pasteries |
| Frequency of consumption (times per day) of all egg dishes except omega 3 eggs |
| Frequency of consumption (times per day) of high fibre breakfast cereals |
| Frequency of consumption (times per day) of fish |
| Frequency of consumption (times per day) of french fries or pan-fried potatoes, poutine |
| Frequency of consumption (times per day) of fruit |
| Frequency of consumption (times per day) of green salad |
| Frequency of consumption (times per day) of legumes: beans, peas, lentils |
| Frequency of consumption (times per day) of 2%, 1%, skim milk |
| Frequency of consumption (times per day) of all low-fat cheeses |
| Frequency of consumption (times per day) of yogurt (low-fat) |
| Frequency of consumption (times per day) of beef, pork |
| Frequency of consumption (times per day) of other meats (veal, lamb, game) |
| Frequency of consumption (times per day) of nuts, seeds and peanut butter |
| Frequency of consumption (times per day) of omega-3 eggs |
| Frequency of consumption (times per day) of patÃ©s, cretons, terrines |
| Frequency of consumption (times per day) of potatoes |
| Frequency of consumption (times per day) of 100% pure fruit juices |
| Frequency of consumption (times per day) of salty snacks |
| Frequency of consumption (times per day) of sausages, hot dogs, ham, smoked meat, bacon |
| Frequency of consumption (times per day) of sauces and gravies |
| Frequency of consumption (times per day) of other vegetables (except carrots, potatoes or salad) |
| Frequency of consumption (times per day) of whole milk 3.25% m.f |
| Frequency of consumption (times per day) of yogurt (regular) |
| Dwelling type |
| Dwelling ownership/ rent status |
| Accuracy of Response |
| Intention to perform |
| Need of Reminders |
| Primary Care Posttraumatic Stress Disorder (PC-PTSD) score |
| Number of missing items on PC-PTSD |
| Subjective retirement status |
| Aboriginal identity |
| Cultural / Racial Background |
| First Official Language Learned and Still Understood |
| Language(s) in Which Respondent Can Converse |
| Immigration Flag |
| Country of Birth - grouped |
| Marital/partner status |
| Sexual orientation |
| Religion |
| Urban/ rural classification |
| Biological sex |
| Required more than 30 min to fall asleep |
| Number of sleep hours during past month |
| Frequency waking up and having difficulty falling asleep again |
| Satisfaction with current sleep pattern |
| Frequency finding difficulty to stay awake during normal hours |
| Satisfaction with Life Scale (SWLS) - Classification |
| SWLS: The conditions of my life are excellent - Grouped |
| SWLS: I have gotten the important things I want in life - Grouped |
| SWLS: Life is close to my ideal - Grouped |
| SWLS: If I could live my life over, I would change almost nothing - Grouped |
| SWLS: I am satisfied with my life - Grouped |
| Satisfaction with Life Scale (SWLS) - Score |
| Type of Smoker |
| Number of cigarette packs per year |
| Number of living children |
| Number of Persons in Household Greater Than or Equal to 65 Years of Age |
| Number of Persons in Household Between 16 and 64 Years of Age |
| Living/Family Arrangement of Participant (generational households) |
| Number of Persons in Household Less Than 16 Years of Age |
| Number of close friends |
| Number of people living in household (excluding the participant) |
| Number of Children Living in Household |
| Number of neighbours |
| Number of people known through other activities |
| Number of people known through community involvement |
| Number of people known through work or school |
| Number of living relatives |
| Last get together with children outside of household |
| Last get together with close friends outside of household |
| Last get together with neighbours |
| Last get together with relatives outside of household |
| Last get together with siblings outside of household |
| Number of living siblings |
| Frequency of Community-Related Activity Participation (past 12 months) |
| Max forced expiratory volume |
| Max forced vital capacity |
| Affection - MOS Subscale |
| Emotional and Informational Support - MOS Subscale |
| Positive Social Interaction - MOS Subscale |
| Tangible Social Support - MOS Subscale |
| Language used at start of interview |
| Stroop test score |
| Accuracy of Response |
| Intention to perform |
| Need of Reminders |
| Intaocular pressure - left eye |
| Intaocular pressure - right eye |
| Visual acuity test result for both eyes |
| Visual acuity test result for left eye |
| Visual acuity test result for right eye |
| Eyesight rating |
| Average weight in kg |
| Waist to hip ratio |
| Ever used hormone replacement therapy |
| Occurrence of menopause |
| Age of menopause onset |

**Supplemental Figure 1: R packages used in the analysis**


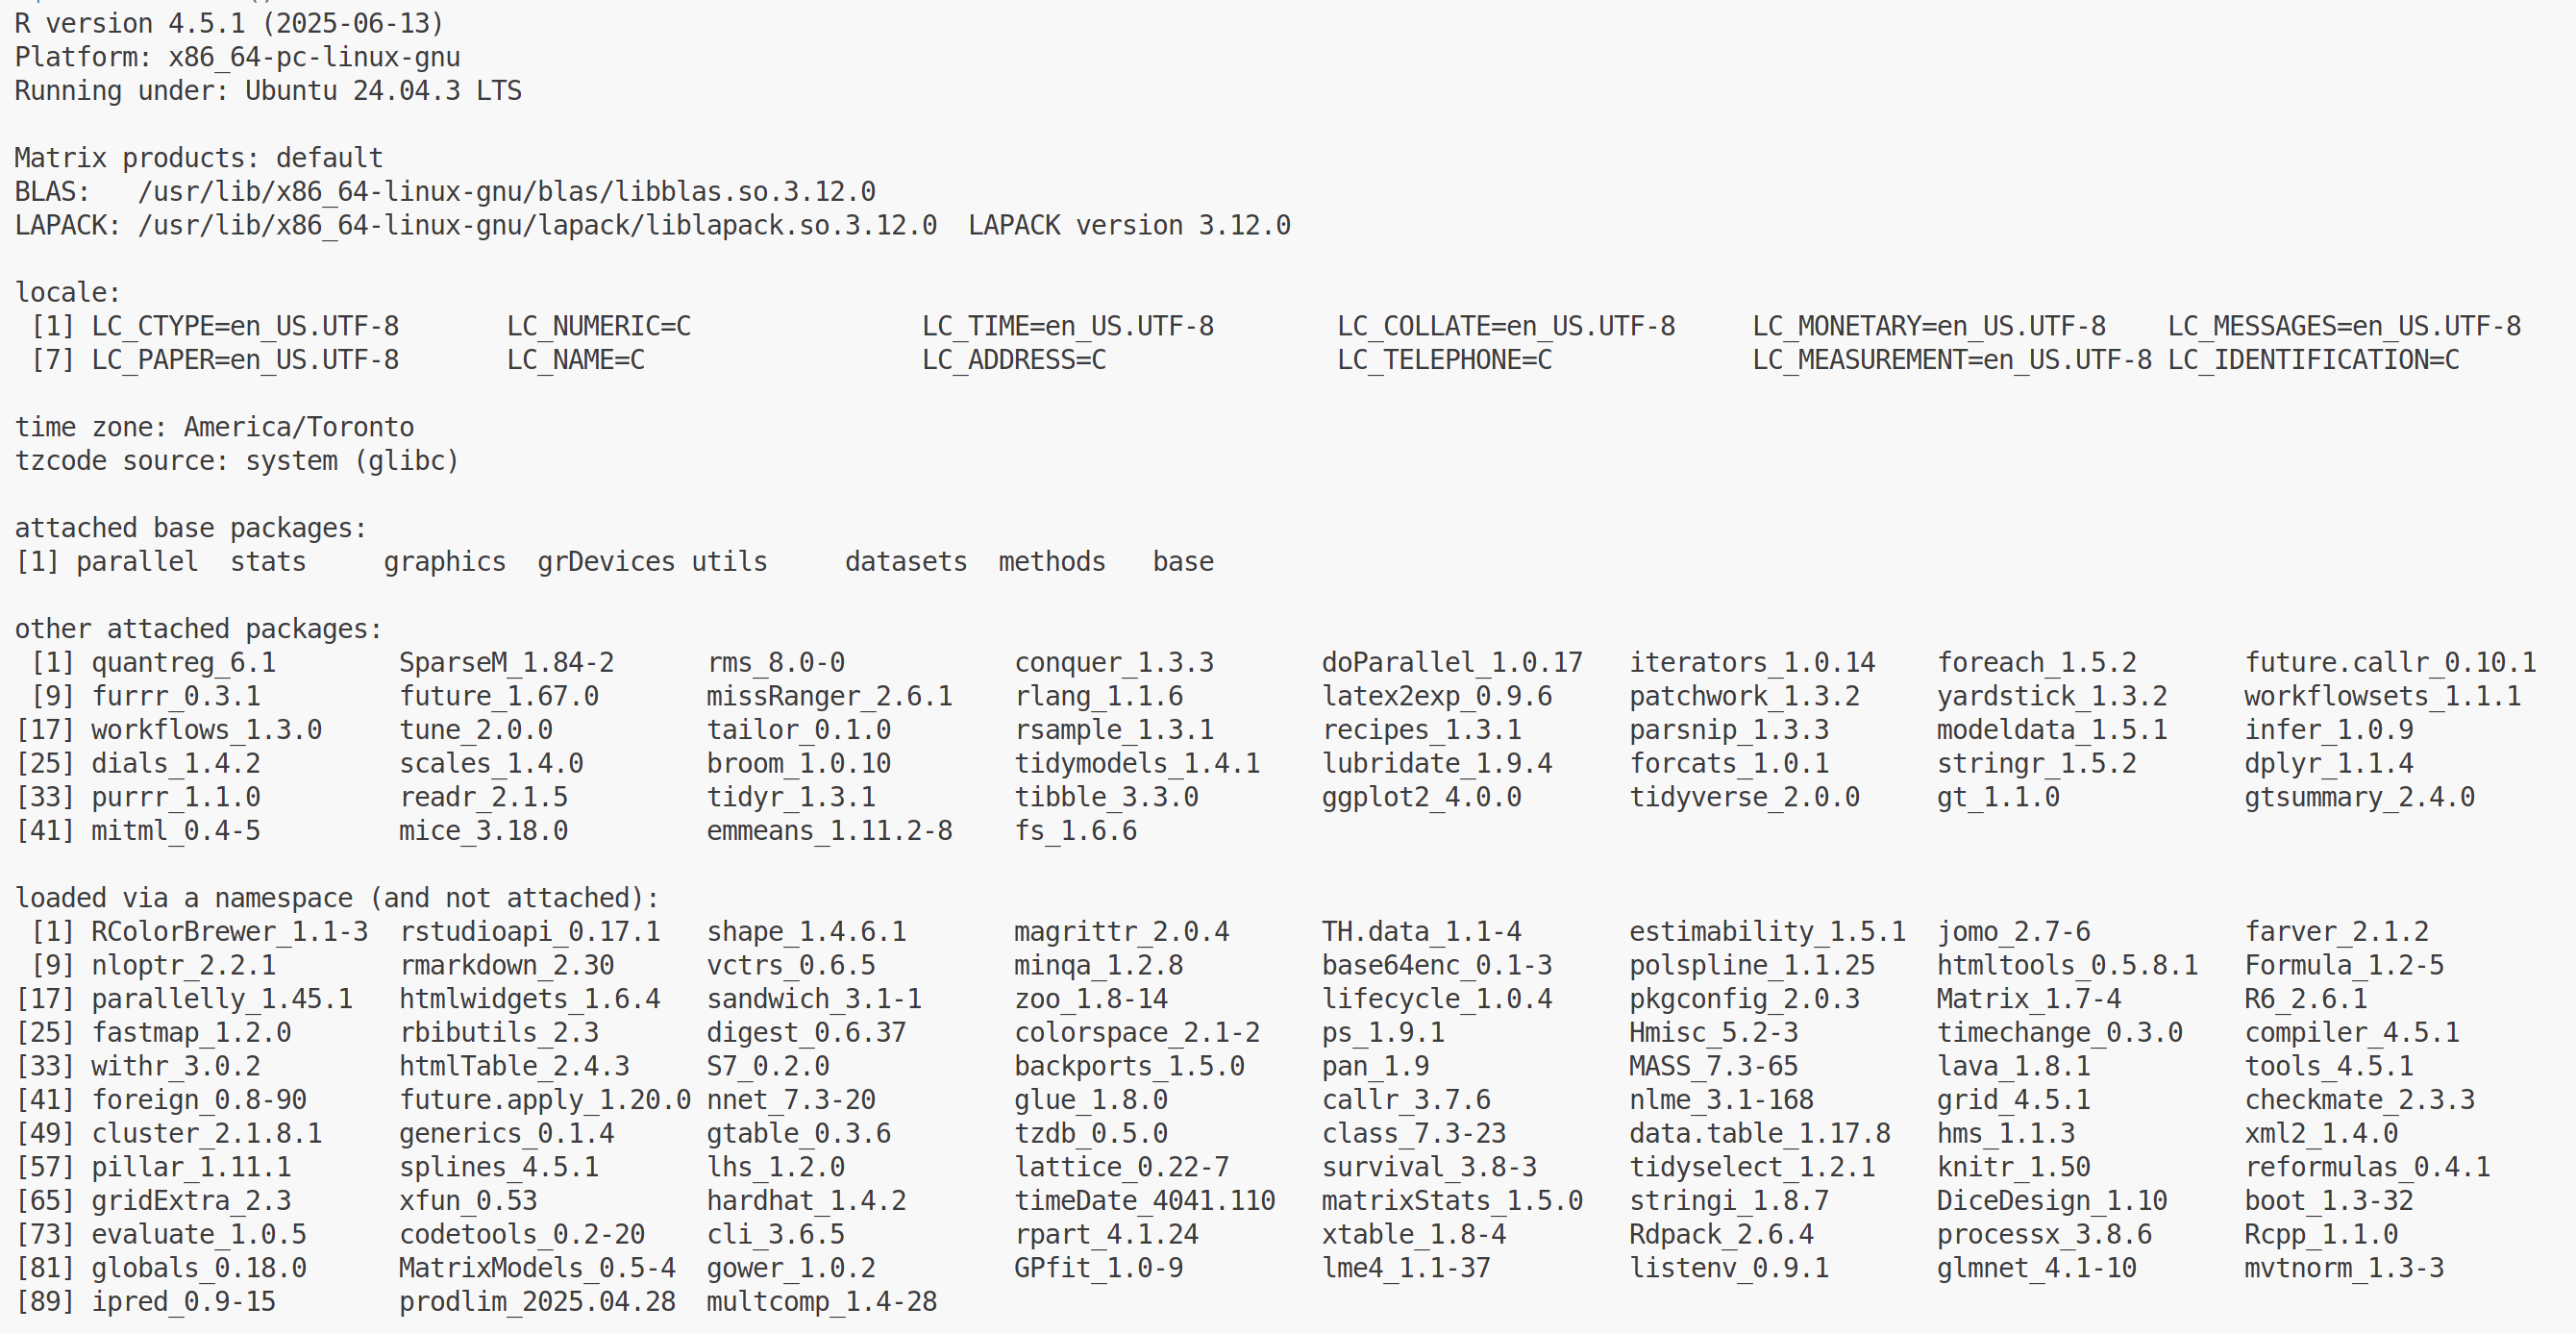


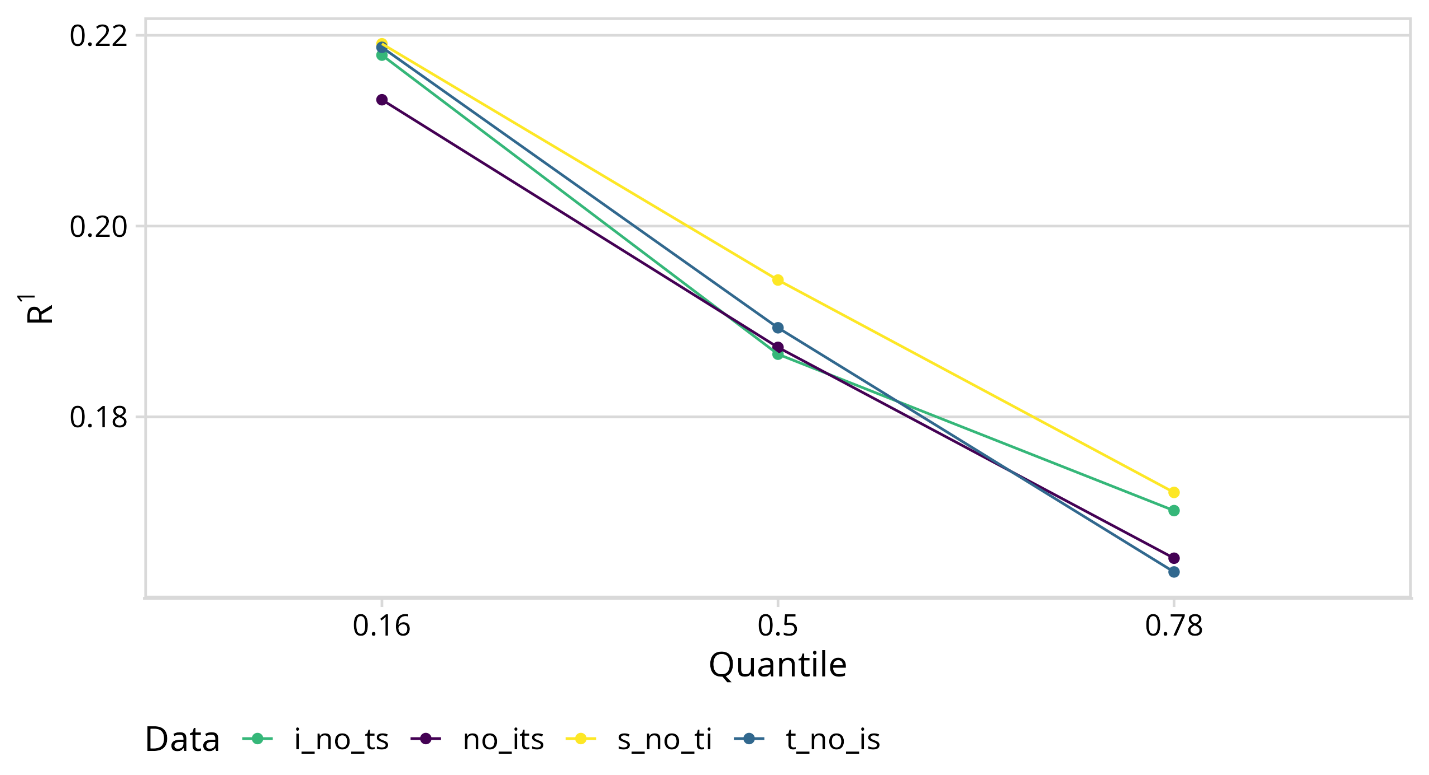


**Supplemental Figure 2: Predictive performance of quantile regression models on the test set across four feature engineering strategies. Across the quantiles, the strategy using splines and no transformations or interactions (s_no_ti or yellow), generalized best.**


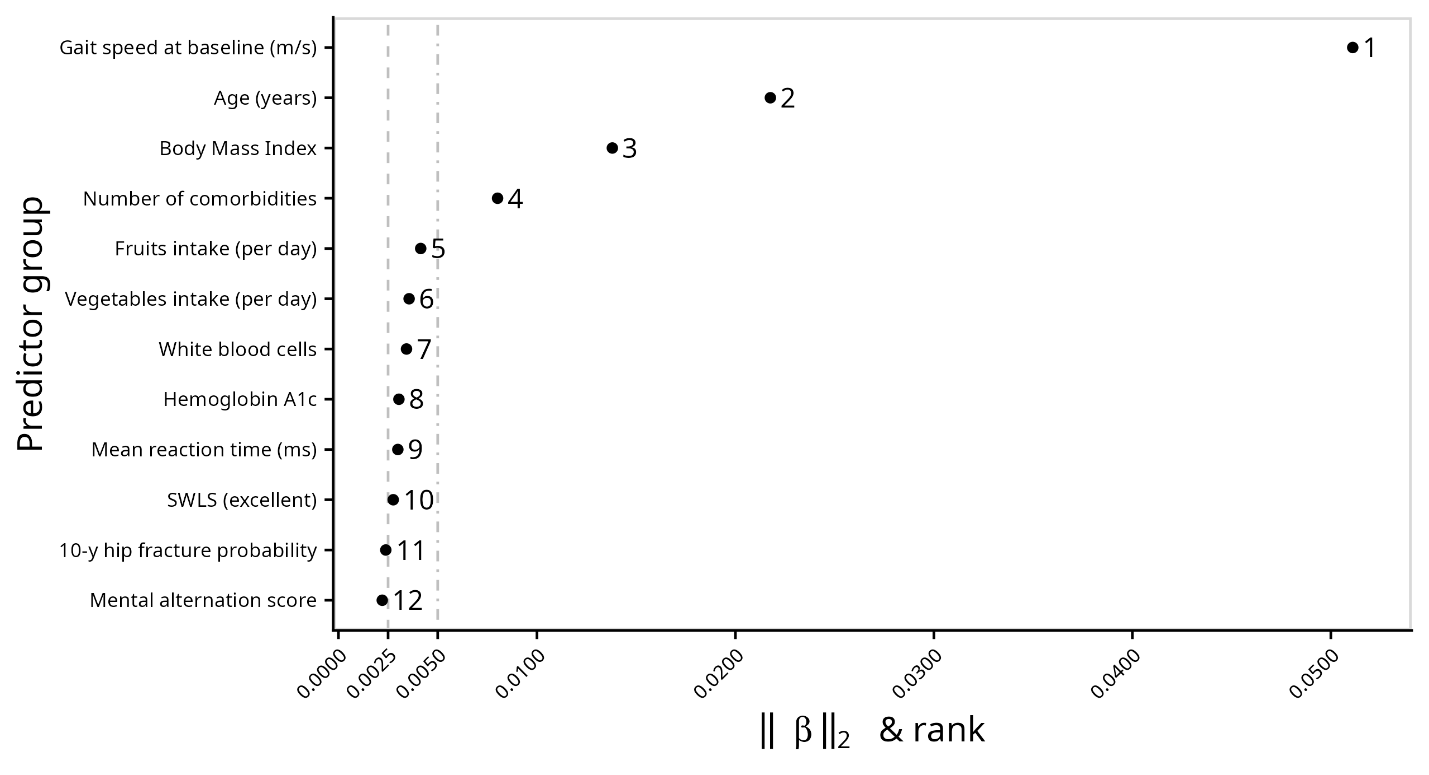


**Supplemental Figure 3: Coefficient L2 norms at the 78th quantile, based on training set results using the λ selected via 10fCV. Four predictors stand out due to their large coefficient L2 norms: baseline gait speed, age, BMI, and comorbidity count. Predictors with ranks five through twelve exhibits substantially smaller L2 norms, suggesting their associations with follow-up gait speed may be less stable.**


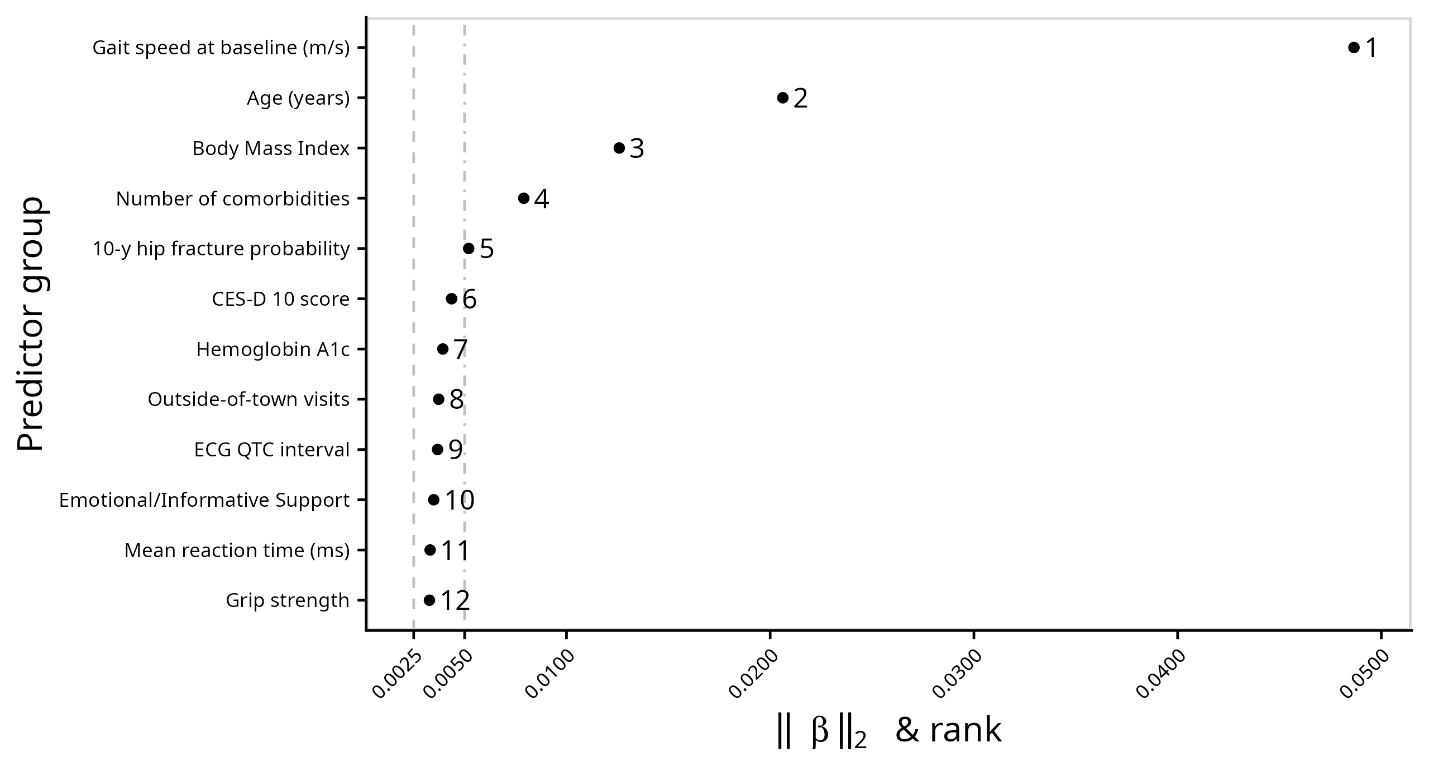
 **Supplemental Figure 4: Coefficient L2 norms at the 16th quantile, based on training set results using the λ selected via 10fCV.**


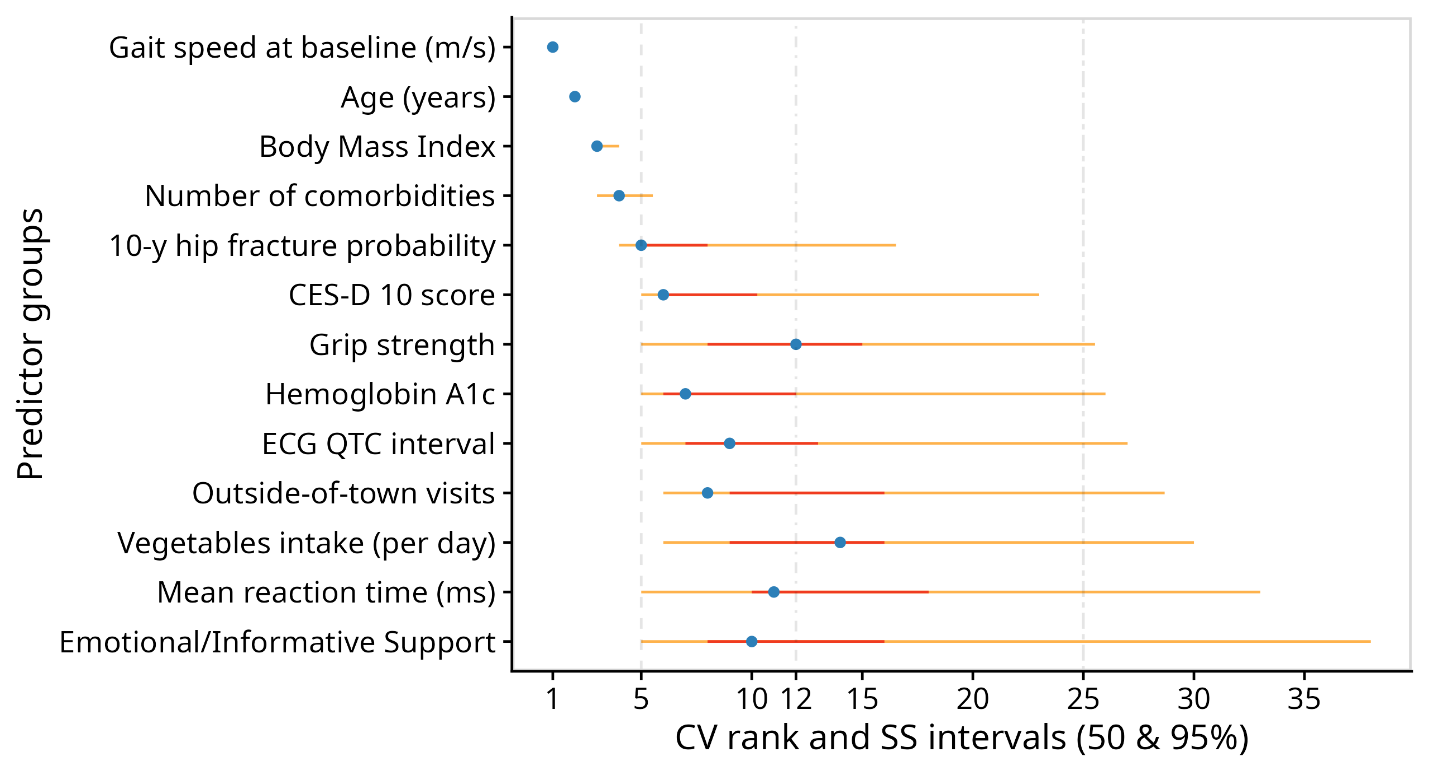
 **Supplemental Figure 5: Stability results for the 16th quantile: blue dots show ranks from the 10fCV, red lines indicate 50% percentile rank intervals, and yellow lines represent 95% intervals.**


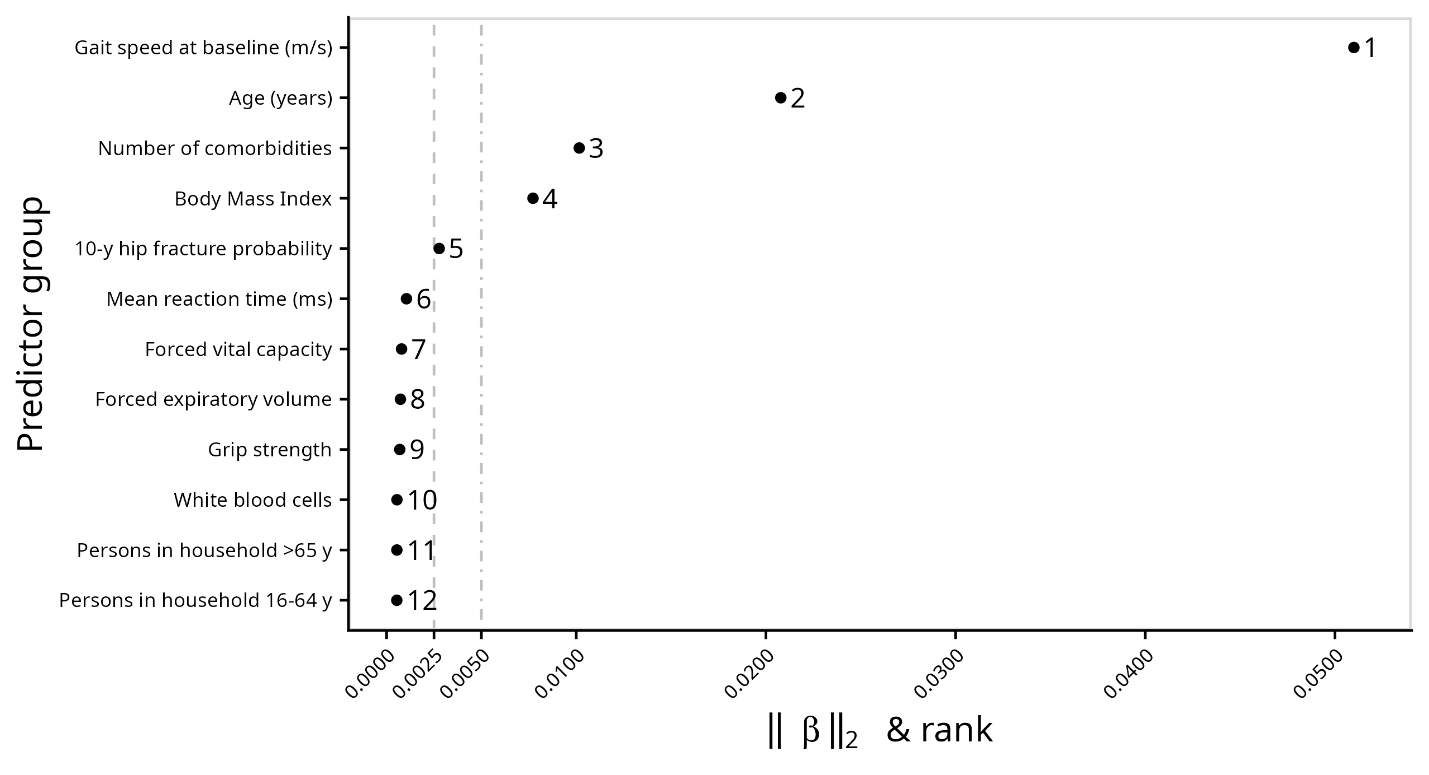
 **Supplemental Figure 6: Coefficient L2 norms at the 50th quantile, based on training set results using the λ selected via 10fCV.**


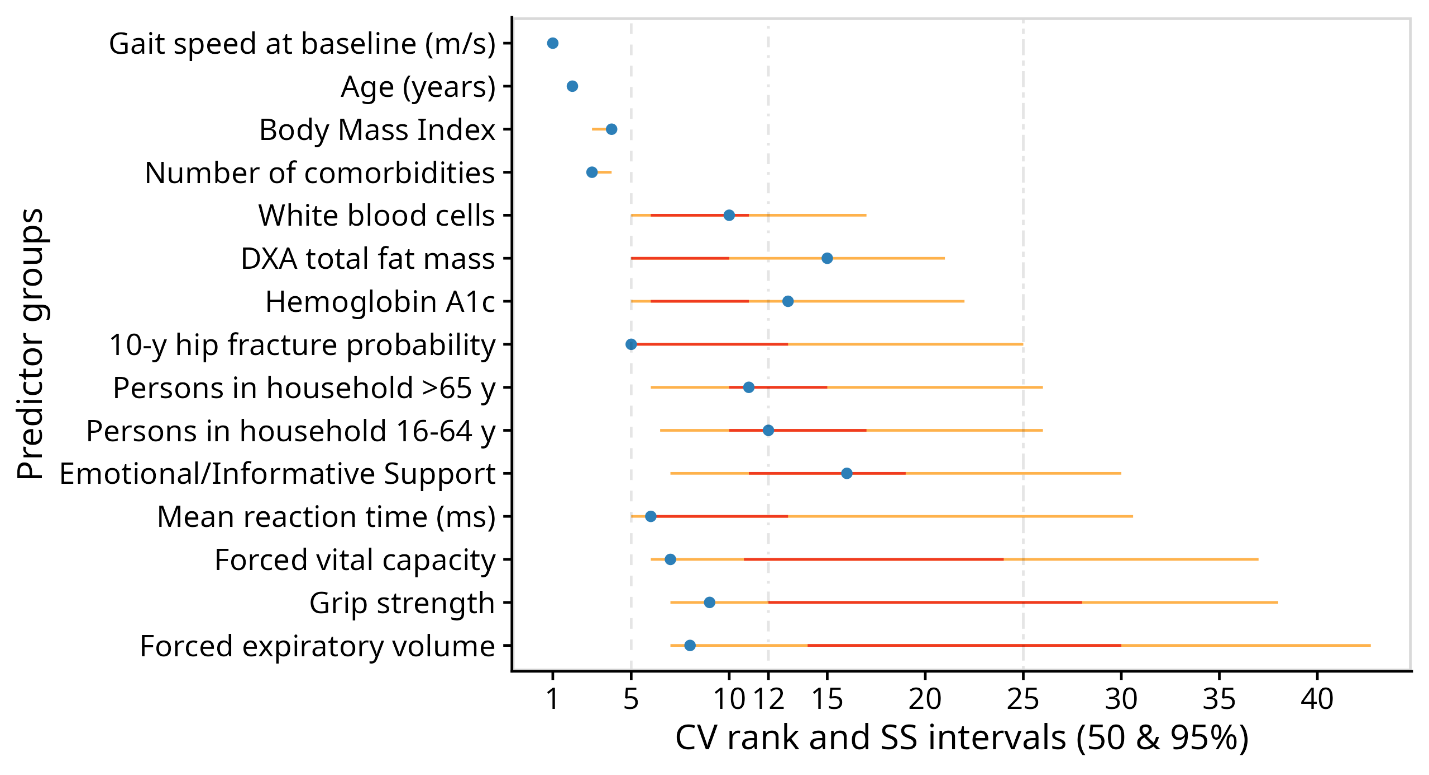
 **Supplemental Figure 7: Stability results for the 50th quantile: blue dots show ranks from the 10fCV, red lines indicate 50% percentile rank intervals, and yellow lines represent 95% intervals.**


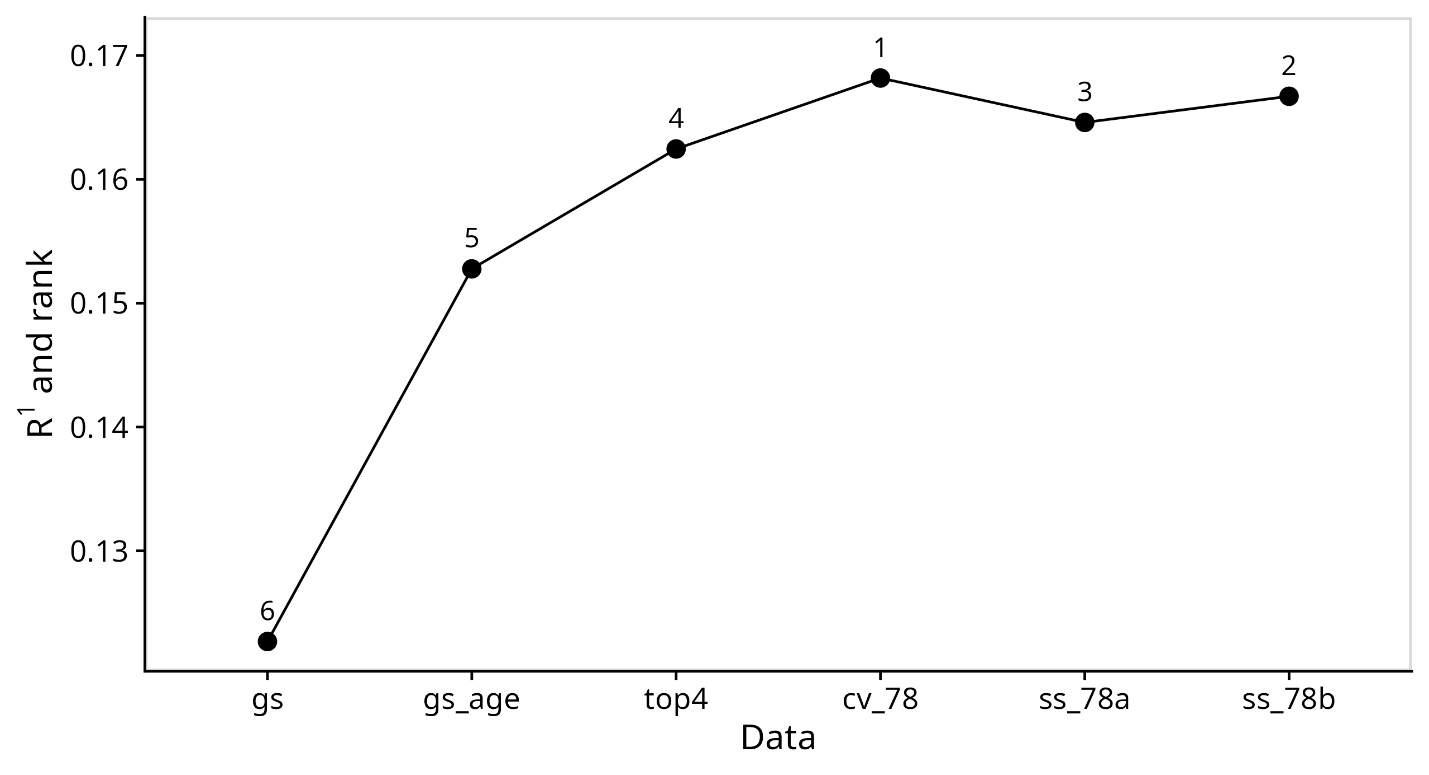
 **Supplemental Figure 8: Data splitting results at the 78th quantile. The model using predictors with an upper 95th percentile ranks ≤ 25 (ss_78b) has fewer predictors than the one from 10fCV (cv_78) and generalizes to new data equally well based on a region of practical equivalence of 0.005. The cv_78 model and the model with predictors having an upper 95th percentile ranks ≤ 20 (ss_78a) fell just below the equivalence threshold of 0.95. All comparisons showed equivalence when the ROPE was widened to 0.01.**


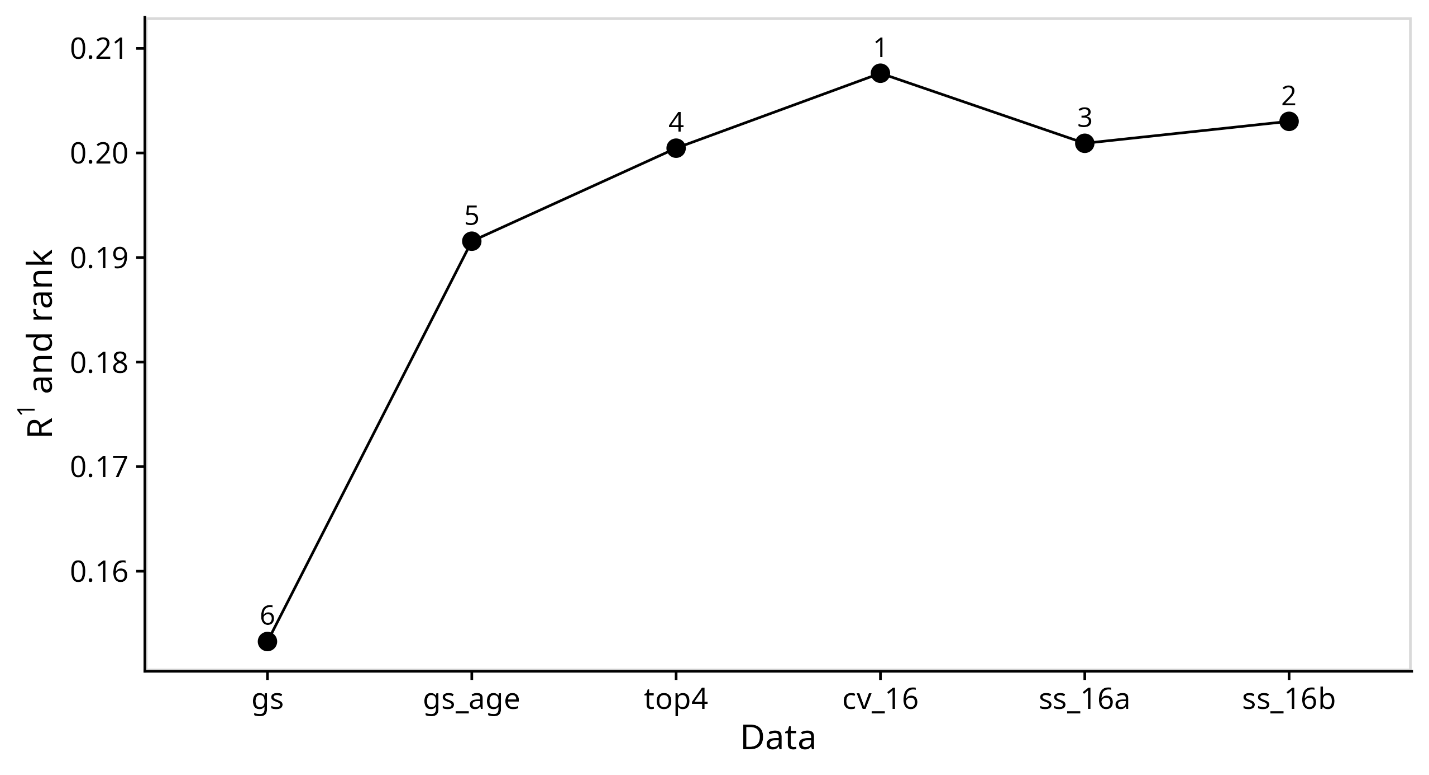
 **Supplemental Figure 9: Data splitting results at the 16th quantile. The model using the top ten predictors from 10fCV (cv_16) generalizes to new data best and is superior to the other models using a region of practical equivalence of 0.005 and 0.01.**


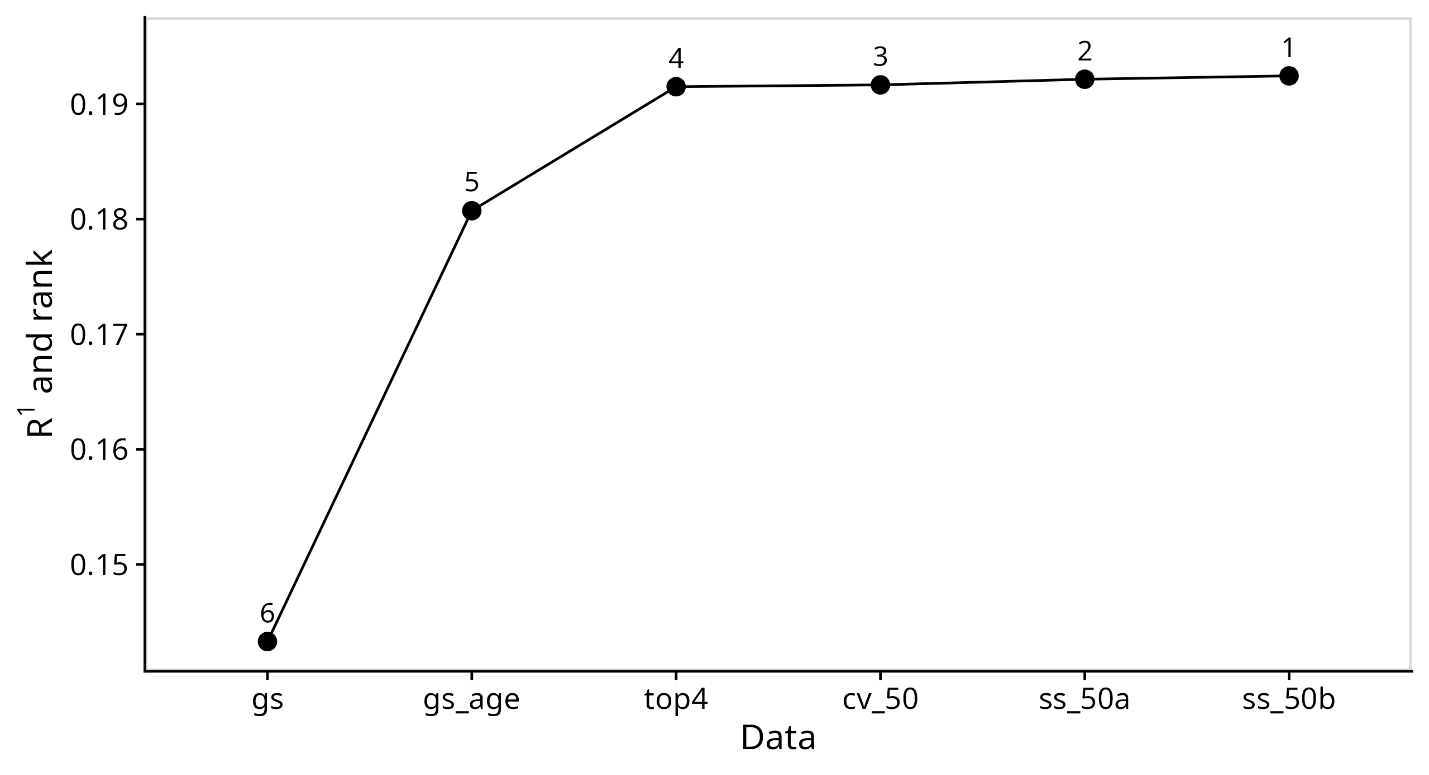


**Supplemental Figure 10: Data splitting results at the 50th quantile. There is little improvement in the model's predictive performance when adding predictors beyond the top four (top4): baseline gait speed, number of comorbidities, age and BMI. Models with ranks 1 through 4 are equivalent using a region of practical equivalence of 0.005.**


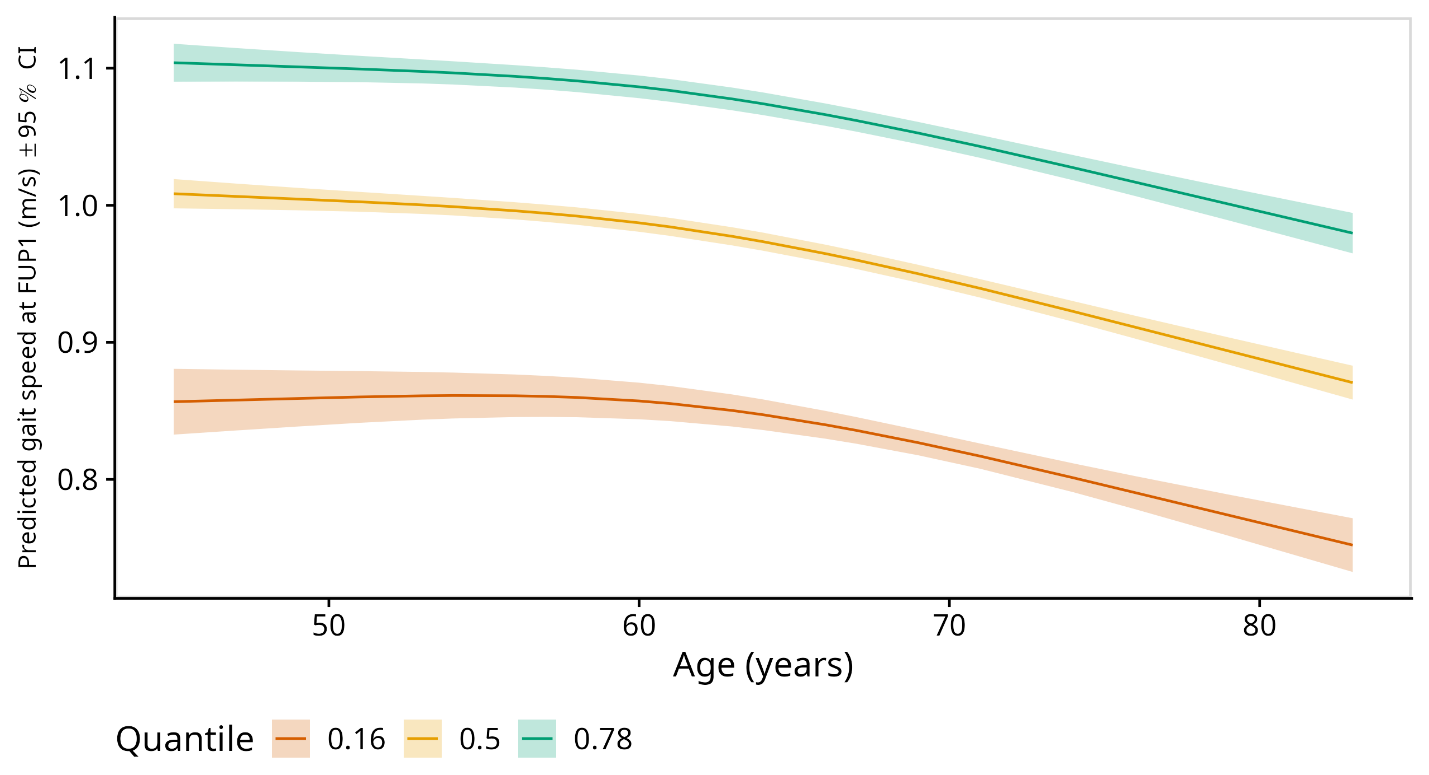


**Supplemental Figure 11: Illustrates how chronological age affects gait speed at follow-up 1 across the three quantiles. As the quantiles increase, participants less than 60 years old have a sharper decline in gait speed. The 95% CIs are point-wise confidence intervals.**


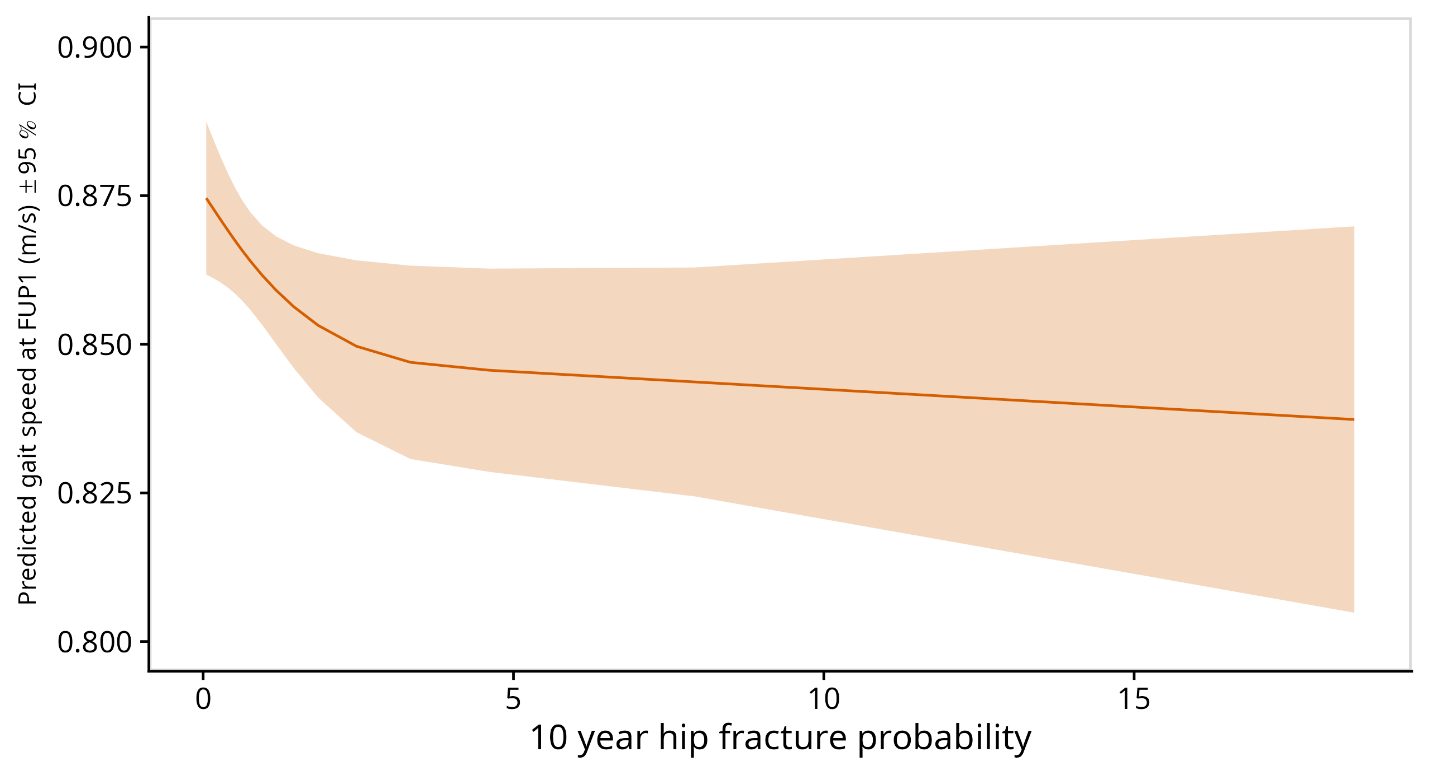
 **Supplemental Figure 12: Depicts how 10-year probability of hip fracture affects the 16th quantile of gait speed at 3 years. There is a rapid decline in the 16th quantile, which slows as the probability approaches 5%. The 95% CIs are point-wise confidence intervals.**


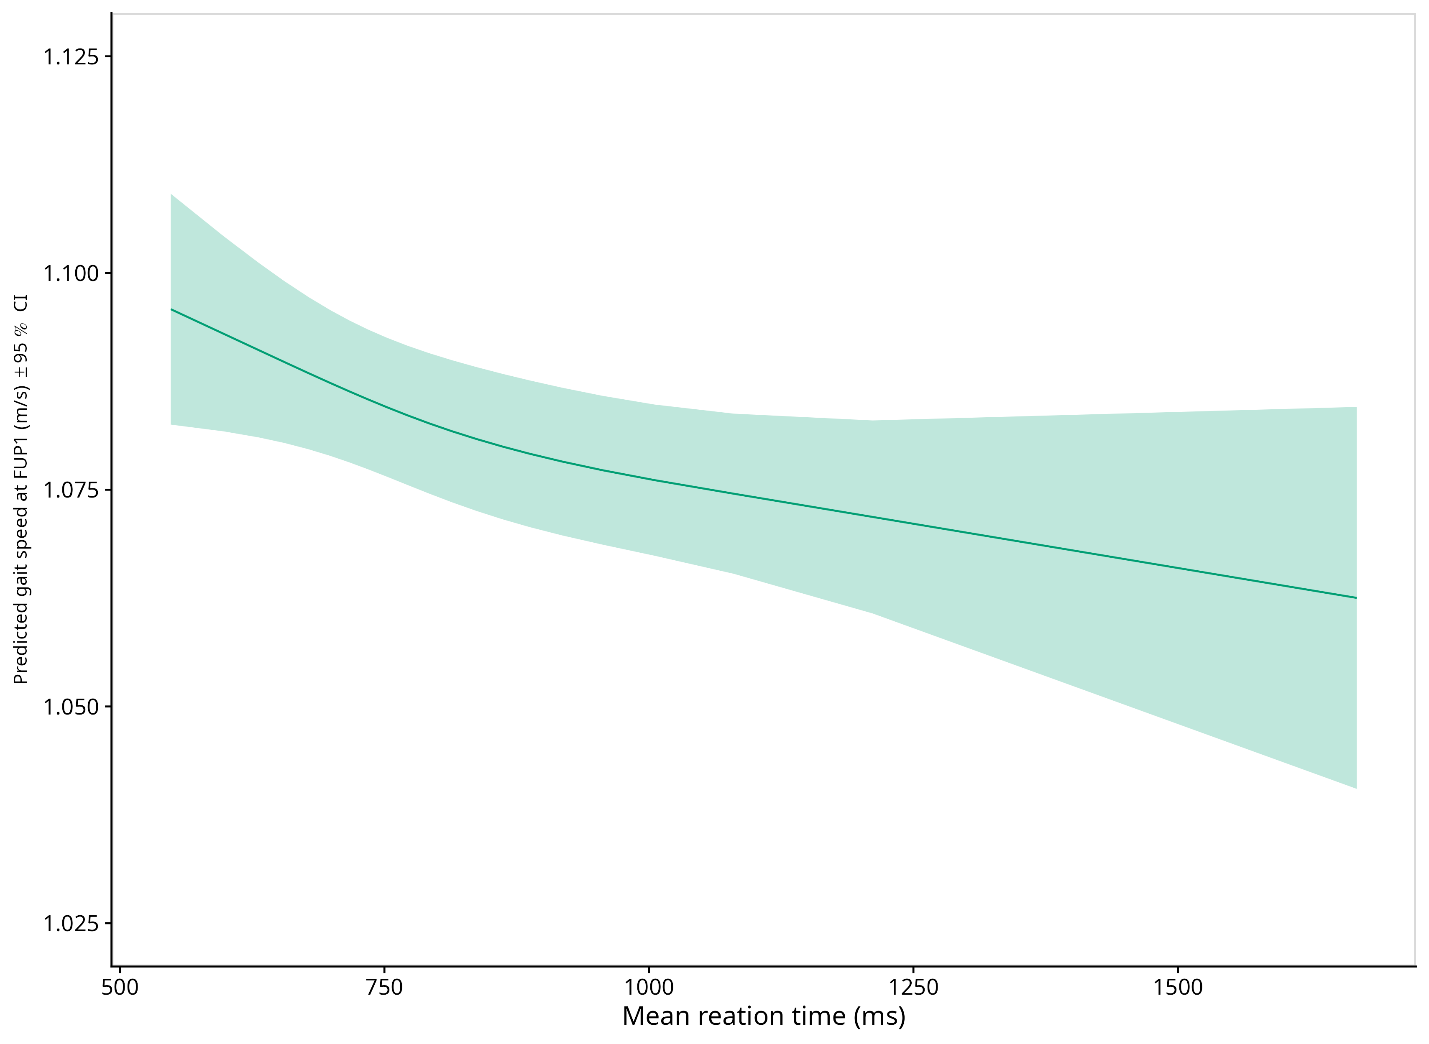
 **Supplemental Figure 13: Depicts how mean reaction time affects the 78th quantile of gait speed at 3 years. There is a slope change approaching 1000ms, attenuating the decline in the 78th quantile. The 95% CIs are point-wise confidence intervals.**
